# 1 **Defining marine microbial biomes from environmental and dispersal filtered** 2 **metapopulations**

3  
4 Markus V. Lindh<sup>a\*</sup>

5  
6 <sup>a</sup>Department of Biology, Lund University, SE-22362 Lund, Sweden

7 \*Corresponding author, *E-mail address*: markusvlindh@gmail.com

8  
9 **Keywords:** biome, occupancy-frequency, biogeography, core, satellite, Hanski, Longhurst,  
10 computational biology, model, habitat filtering, dispersal limitation

## 11 12 **Summary**

13 Energy and matter fluxes essential for all life<sup>1</sup> are modulated by spatial and temporal shifts in  
14 microbial community structure resulting from environmental and dispersal filtering<sup>2,3</sup>,  
15 emphasizing the continued need to characterize microbial biogeography<sup>4,5</sup>. Yet, application of  
16 metapopulation theory, traditionally used in general ecology for understanding shifts in  
17 biogeographical patterns among macroorganisms, has not been tested extensively for defining  
18 marine microbial populations filtered by environmental conditions and dispersal limitation at  
19 global ocean scales. Here we show, from applying metapopulation theory on two major global  
20 ocean datasets<sup>6,7</sup>, that microbial populations exhibit core- and satellite distributions with  
21 cosmopolitan compared to geographically restricted distributions of populations. We found  
22 significant bimodal occupancy-frequency patterns (the different number of species occupying  
23 different number of patches) at varying spatial scales, where shifts from bimodal to unimodal  
24 patterns indicated environmental and dispersal filtering. Such bimodal occupancy-frequency  
25 patterns were validated in Longhurst's classical biogeographical framework<sup>8</sup> and *in silico*  
26 where observed bimodal patterns often aligned with specific biomes and provinces described  
27 by Longhurst and where found to be non-random in randomized datasets and mock  
28 communities. Taken together, our results show that application of metapopulation theory  
29 provides a framework for determining distinct microbial biomes maintained by environmental  
30 and dispersal filtering.

31 Discovery of biogeographical patterns in marine microbial assemblages<sup>6,7,9-12</sup> caused  
32 considerable excitements because it indicated distribution patterns analogous to  
33 macroecological patterns<sup>13-17</sup>. These observations have provided clues that marine microbes  
34 are, at least to some extent, limited by the environment and their dispersal capacity rather than  
35 being cosmopolitan.

36 Metapopulation theory is a key framework in general ecology and incorporates  
37 population dispersal to empirically test occupancy-frequency distributions of different  
38 organisms ranging from insects to plants<sup>18</sup>. Predictions of occupancy-frequency patterns have  
39 been developed in e.g. the core- and satellite hypothesis (CSH) by Ilkka Hanski<sup>19</sup> where the  
40 so-called rescue effect supports the survival of metapopulations, and forms a bimodal  
41 occupancy-frequency pattern (See Fig. 1A). Previous results applying the CSH to marine  
42 ecosystems suggest that this approach could potentially allow for precise definitions of  
43 microbial biomes<sup>20</sup>.

44 Here we collected data on bacterial and archaeal populations (estimated from  
45 16S rRNA gene sequencing and metagenomic data) obtained from two recent major global  
46 ocean datasets, Tara oceans<sup>6</sup> and Malaspina<sup>7</sup> (Fig. S1) to examine the shape of occupancy-  
47 frequency distributions in global ocean data and aimed to define distinct microbial biomes.

48 For the Tara oceans dataset<sup>6</sup> we focused our analyses on surface seawater ( $\leq 5$   
49 m) and analyzed 63 stations in total (Fig. S1). Occupancy-frequency analysis for the whole  
50 transect revealed a significant bimodal pattern, with the number of populations demonstrating  
51 a monotonic decrease with increasing number of sites occupied followed by an increase in the  
52 number of populations occupying all sites (Fig. 1B; Table 1; Mitchell-Old's and Shaw's test,  
53  $p < 0.05$ ). In addition, populations affiliated with Alphaproteobacteria (represented mainly by  
54 the SAR11 clade bacteria) also exhibited bimodality for the whole transect (Table 1; Mitchell-  
55 Old's and Shaw's test,  $p < 0.05$ ). In contrast, Euryarchaeota, Cyanobacteria,

56 Gammaproteobacteria and Bacteroidetes did not exhibit significant bimodal patterns (Table 1;  
57 Mitchell-Old's and Shaw's test,  $p > 0.05$ ). Such results indicate that, among individual taxa,  
58 except Alphaproteobacteria, surface ocean microbial communities can be limited by the  
59 prevailing environmental conditions and their dispersal capacity.

60 For subsets in the whole Tara Oceans transect, here exemplified by the South  
61 Pacific and North Atlantic, we found significant bimodal occupancy-frequency patterns for  
62 the total community (Table 1; Mitchell-Old's and Shaw's test,  $p < 0.05$ ). We note that  
63 Euryarchaeota populations only exhibited a bimodal pattern in the North Atlantic basin (Table  
64 1; Mitchell-Old's and Shaw's test,  $p < 0.05$ ). Our results therefore indicate that the total  
65 community and most individual taxa are bimodal within a coherent oceanic region.  
66 Reciprocally, particular microbial groups are subjected to environmental and dispersal  
67 filtering<sup>21</sup> at different spatial scales resulting in geographically constricted populations.

68 The Malaspina dataset<sup>7</sup> contained 30 stations collected from the deep-sea,  
69 typically  $\geq 4000$  m deep (Fig. S1). This dataset also included size-fractionated samples  
70 corresponding to free-living ( $> 0.2$  and  $< 0.8$   $\mu\text{m}$ ) and particle-attached ( $> 0.8$  and  $< 20$   $\mu\text{m}$ )  
71 microbial assemblages. Analysis of occupancy-frequency patterns among deep-sea microbial  
72 assemblages revealed a significant bimodal pattern of the total community in the whole  
73 transect for both free-living and particle-attached populations (Fig. 1C; Table 1). Thus,  
74 although most deep-sea microbes have been suggested to be confined to a specific region<sup>7</sup>,  
75 our results indicate that a core deep-sea community are still distributed across the whole  
76 Malaspina transect, suggesting a similar microbial biome without environmental or dispersal  
77 filtering.

78 Variations in the shape of occupancy-frequency distributions in the Malaspina  
79 transect were found for different size fractions, taxa, oceanic basins and taxa within different  
80 basins (Table 1). For example, Thaumarchaeota populations displayed bimodality in the

81 South Atlantic in the particle-attached community (Table 1; Mitchell-Old's and Shaw's test,  
82  $p < 0.05$ ) but not in the free-living community (Table 1; Mitchell-Old's and Shaw's test,  
83  $p > 0.05$ ). In the South Atlantic, Gammaproteobacteria populations exhibited a bimodal pattern  
84 in both the particle-attached and free-living community (Table 1; Mitchell-Old's and Shaw's  
85 test,  $p < 0.05$ ). We note that samples collected within the same water mass, here exemplified  
86 by "WMbSC 2: NADW-CDW-AABW" and "WMbSC 4: Purest AABW Ross", often  
87 showed a bimodal occupancy-frequency pattern (Table 1; Mitchell-Old's and Shaw's test,  
88  $p < 0.05$ ). Overall these findings substantiate that particular taxa such as Thaumarchaeota can  
89 be limited by environmental conditions and dispersal capacity and thus geographically  
90 restricted.

91 We further aimed to validate our observed microbial biomes estimated from  
92 bimodal occupancy-frequency patterns in the framework of Longhurst's ecological biomes  
93 and provinces that define biogeographic distributions derived in large part from satellite-  
94 based estimations of sea-surface chlorophyll *a* (Chl *a*) concentrations<sup>8</sup>. Longhurst defines four  
95 primary oceanic biomes; the Westerlies, Trades, Polar and Coastal (Fig. S1). These biomes  
96 differ in nutrient supply, light and seasonal variation in water column mixing. The biomes are  
97 in turn subdivided into several provinces based on Chl *a* distributions (Fig. S1). Our analysis  
98 revealed that samples collected as part of the Tara Oceans transect within the Coastal,  
99 Westerlies and Trades biomes displayed a distinct bimodal occupancy-frequency pattern  
100 (Table 1; Mitchell-Old's and Shaw's test,  $p < 0.05$ ). In addition, provinces such as the Indian  
101 Monsoon Gyres Province (MONS) and South Atlantic Gyre Province (SATL), exhibited  
102 significant bimodal patterns (Table 1; Mitchell-Old's and Shaw's test,  $p < 0.05$ ).

103 During the Malaspina transect examining the deep-sea microbes, only the  
104 particle-attached microbial community exhibited bimodal occupancy-frequency in the SATL  
105 (Table 1; Mitchell-Old's and Shaw's test,  $p < 0.05$ ). Gammaproteobacteria displayed

106 bimodality in the SATL both within the free-living and particle-attached community (Table 1;  
107 Mitchell-Old's and Shaw's test,  $p < 0.05$ ). However, only particle-attached Alpha- and  
108 Actinobacteria displayed bimodality in SATL (Table 1; Mitchell-Old's and Shaw's test,  
109  $p < 0.05$ ). Collectively, these findings emphasize that occupancy-frequency patterns among  
110 microbial assemblages can likely be used to validate and significantly extend analyses of  
111 oceanic divisions as determined by e.g. Chl *a* satellite data<sup>8</sup>.

112           The difficulty in assessing and discerning sampling effects from true biological  
113 effects for understanding metapopulation dynamics is well recognized in terrestrial studies of  
114 macroorganisms<sup>18</sup>. Here we aimed to (i) examine the effect of sequencing depth on the  
115 cumulative number of core and satellite populations, and (ii) elucidate if bimodal patterns  
116 could arise from pure chance and hence be an artefactual effect in marine microbial  
117 assemblages. The number of core and satellite populations in subsampled rarefied datasets  
118 reached saturation around 25,000 sequence reads (Fig. S2). *In silico* tests with randomized  
119 datasets and mock communities confirmed that bimodal patterns were non-random, as no  
120 significant bimodal pattern was found in any randomized dataset or mock communities (Fig  
121 2A-B; Mitchell-Old's and Shaw's test,  $p > 0.05$ ). Our extensive *in silico* analyses provided a  
122 first clue that bimodality could be a biological pattern rather than an artefactual effect.

123           To test the possibility of allowing the metapopulation framework to pinpoint  
124 microbial biomes without testing against a pre-defined oceanic region we analyzed 5 patches  
125 at a time in sequence along the Tara oceans transect (Fig. 2C-D). This exercise highlighted  
126 oceanic regions where the core populations (bimodal occupancy-frequency patterns; Mitchell-  
127 Old's and Shaw's test,  $p < 0.05$ ) prevailed and the community was not limited by the  
128 environment or dispersal capacity. Reciprocally, we could also define specific microbial  
129 biomes along the transect (non-bimodal occupancy-frequency patterns; Mitchell-Old's and

130 Shaw's test,  $p > 0.05$ ). It was noteworthy that for all taxa combined, stations obtained in the  
131 Southern Ocean limited the distribution of microbial assemblages (Fig. 2C).

132 For individual taxa in this unsupervised model, the occupancy-frequency pattern  
133 varied substantially and different major microbial groups were subjected to different  
134 environmental and dispersal filters. Euryarchaeota only had significant bimodal patterns in  
135 patches sampled from the North Atlantic, Red Sea, Arabian Sea and the Indian Ocean.  
136 Cyanobacteria exhibited bimodality in the Pacific Ocean but the pattern broke down upon  
137 entry into the Atlantic Ocean (Fig. 2D). Notably, within Cyanobacteria, *Synechococcus* had a  
138 geographical restriction between the North and South Pacific Ocean (see insert Fig. 2D).  
139 *Synechococcus* were also limited in their distributions in the Indian Ocean by a single site.  
140 Alphaproteobacteria had a similar metapopulation distribution limitation as the total  
141 community and Cyanobacteria in the Southern Ocean. Yet, within Alphaproteobacteria,  
142 SAR11 clade bacteria (see insert Fig. 2D) had a wider distribution, exemplified by a bimodal  
143 pattern between sites obtained in the South Atlantic and Southern Ocean. Still, SAR11 were  
144 limited upon entry into the Pacific Ocean. Gammaproteobacteria and Bacteroidetes displayed  
145 a clear distinction between samples obtained in the Indian Ocean and South Atlantic where  
146 the core community was constrained by the station outside Cape Town.

147 Taken together, we demonstrate that empirical tests of metapopulation dynamics  
148 allows for biogeographical analyses of marine microbes to define microbial biomes. We note  
149 that a sequence depth of 25,000 sequence reads is sufficient to capture most of the core- and  
150 satellite populations and could be considered as lower limit for microbial biogeography  
151 analyses at large spatial scales<sup>23</sup>. Thus, variations in microbial biogeography, in particular,  
152 deviations from microbial biomes as defined by the CSH, can potentially be used in  
153 monitoring environmental changes, and might therefore be valuable tools in marine  
154 management.

155

## 156 **Methods**

157           Occupancy-frequency distributions were analyzed as described in<sup>20</sup>. In brief, an  
158 equivalent to Tokeshi's test of bimodality was performed using Mitchell-Olds' and Shaw's  
159 test<sup>22</sup> for the location of quadratic extremes. The global ocean transect data were downloaded  
160 from the European Nucleotide Archive (ENA; accession number PRJEB7988) and the NCBI  
161 Sequence Read Archive (SRA; accession number SRP031469), Tara Oceans and Malaspina  
162 transects, respectively. For *in silico* tests we first tested the effect of sequencing depth and  
163 subsampled the Tara oceans dataset to 100,000 sequence reads and rarefied this subsampled  
164 dataset to 1000, 2000, 5000, 10,000, 20,000, 40,000, 60,000 and 80,000 sequence reads and  
165 plotted the cumulative number of satellite compared to core populations. We further created  
166 one randomized dataset by shuffling the presence/absence of OTUs using the "permatfull"  
167 function in R by keeping the sample sums (100,000 sequence reads) static and performing  
168 999 unrestricted permutations of the OTUs from the subsampled Tara oceans dataset and  
169 picked one random permuted community as mock community and rarefied as above. Thirdly,  
170 for the occupancy-frequency analyses we subsampled the Tara oceans and Malaspina dataset  
171 to 40,590 and 25,000 sequence reads, respectively, well above the suggested lower limit for  
172 diversity analyses of marine microbial assemblages<sup>23</sup> and the 25,000 sequence reads noted in  
173 the test above (Fig. S2). Finally, we randomized each of the subsampled Tara oceans and  
174 Malaspina dataset and specific oceanic regions (North Atlantic, South Pacific and South  
175 Atlantic, Brazil basin, Tara oceans and Malaspina datasets respectively) and we used one  
176 randomized dataset as a mock community and this artificial community were randomized as  
177 described above. All statistical tests were performed in R 3.3.3<sup>24</sup>, and using the package  
178 "Vegan"<sup>25</sup>.

179 **References**

- 180 1 Falkowski, P. G., Barber, R. T. & Smetacek, V. Biogeochemical Controls and  
181 Feedbacks on Ocean Primary Production. *Science* **281**, 200-206 (1998).
- 182 2 Kirchman, D. L., Dittel, A. I., Malmstrom, R. R. & Cottrell, M. T.  
183 Biogeography of major bacterial groups in the Delaware Estuary. *Limn*  
184 *Oceanogr* **50**, 1697-1706 (2005).
- 185 3 Fuhrman, J. A. et al. Annually reoccurring bacterial communities are predictable  
186 from ocean conditions. *Proc Natl Acad Sci USA* **103**, 13104-13109 (2006).
- 187 4 Martiny, J. B. H. et al. Microbial biogeography: putting microorganisms on the  
188 map. *Nat Rev Microbiol* **4**, 102-112 (2006).
- 189 5 Hanson, C. A., Fuhrman, J. A., Horner-Devine, M. C. & Martiny, J. B. Beyond  
190 biogeographic patterns: processes shaping the microbial landscape. *Nat Rev*  
191 *Microbiol* **10**, 497-506 (2012).
- 192 6 Sunagawa, S. et al. Structure and function of the global ocean microbiome.  
193 *Science* **348** (2015).
- 194 7 Salazar, G. et al. Global diversity and biogeography of deep-sea pelagic  
195 prokaryotes. *ISME J* **10** (2016).
- 196 8 Longhurst, A. R. Ecological Geography of the Sea (Second Edition) 1-17  
197 (Academic Press, 2007).
- 198 9 Finlay, B. J. Global Dispersal of Free-Living Microbial Eukaryote Species.  
199 *Science* **296**, 1061-1063 (2002).
- 200 10 Fenchel, T. Biogeography for Bacteria. *Science* **301**, 925-926 (2003).
- 201 11 Pommier, T. et al. Global patterns of diversity and community structure in  
202 marine bacterioplankton. *Mol Ecol* **16**, 867-880 (2007).



- 203 12 Barberan, A. & Casamayor, E. O. Global phylogenetic community structure and  
204 beta-diversity patterns in surface bacterioplankton metacommunities. *Aquat*  
205 *Microb Ecol* **59**, 1-10 (2010).
- 206 13 Horner-Devine, M. C. & Bohannan, B. J. M. Phylogenetic clustering and  
207 overdispersion in bacterial communities *Ecology* **87**, S100-S108 (2006).
- 208 14 Ghiglione, J. F. et al. Pole-to-pole biogeography of surface and deep marine  
209 bacterial communities. *Proc Natl Acad Sci USA* **109**, 17633-17638 (2012).
- 210 15 Amend, A. S. et al. Macroecological patterns of marine bacteria on a global  
211 scale. *J. Biogeogr.* **40**, 800-811 (2013).
- 212 16 Sul, W. J., Oliver, T. A., Ducklow, H. W., Amaral-Zettler, L. A. & Sogin, M. L.  
213 Marine bacteria exhibit a bipolar distribution. *Proc Natl Acad Sci USA* **110**,  
214 2342-2347 (2013).
- 215 17 Zinger, L., Boetius, A. & Ramette, A. Bacterial taxa–area and distance–decay  
216 relationships in marine environments. *Mol Ecol* **23**, 954-964 (2014).
- 217 18 McGeoch, M. A. & Gaston, K. J. Occupancy frequency distributions: patterns,  
218 artefacts and mechanisms. *Biol Rev* **77**, 311-331 (2002).
- 219 19 Hanski, I. Dynamics of regional distribution - the core and satellite species  
220 hypothesis. *Oikos* **38**, 210-221 (1982).
- 221 20 Lindh, M. V. et al. Metapopulation theory identifies biogeographical patterns  
222 among core and satellite marine bacteria scaling from tens to thousands of  
223 kilometers. *Environ Microbiol*, **19**, 1222–1236 (2016).
- 224 21 Mehranvar, L. & Jackson, D. A. History and taxonomy: their roles in the core-  
225 satellite hypothesis. *Oecologia* **127**, 131-142 (2001).

- 226 22 Mitchell-Olds, T. & Shaw, R. G. Regression Analysis of Natural Selection:  
227 Statistical Inference and Biological Interpretation. *Evolution* **41**, 1149-1161  
228 (1987).
- 229 23 Lundin, D. et al. Which sequencing depth is sufficient to describe patterns in  
230 bacterial alpha- and beta-diversity? *Env Microbiol Rep* **4**, 367-372 (2012).
- 231 24 R Core Development Team. A Language and Environment for Statistical  
232 Computing. <https://cran.r-project.org/> (2014).
- 233 25 Oksanen, J. et al. vegan: Community Ecology Package. R package version 1.17-  
234 5. <https://cran.r-project.org/web/packages/vegan/index.html> (2010).
- 235

236 **Figure and Table legends**

237 **Figure 1.** Conceptual drawing of the core satellite hypothesis (CSH; A), and Occupancy-  
238 frequency distributions (the different number of populations occupying different number of  
239 sites) of populations estimated from 16S rRNA gene amplicon and metagenomic data  
240 obtained from the Tara oceans<sup>6</sup> (B), and Malaspina<sup>7</sup> (C) datasets. (A) was modified from<sup>20</sup>;  $P$   
241 is the fraction of occupied sites,  $C$  is colonization rate and  $E$  is extinction rate. The quadratic  
242 colonization and extinction rates are calculated according to  $dP/dt = CP(1 - P) - EP(1 - P)^{19}$ .  
243 The CSH predicts a bimodal pattern, and incorporates positive feedback mechanisms between  
244 local abundance and regional occupancy<sup>19</sup>. High rates of colonization in the CSH protect a  
245 population from extinction and are known as the rescue effect.

246

247 **Figure 2.** *In silico* tests of randomized sequence data and microbial biomes defined by shifts  
248 from bimodal occupancy-frequency patterns to unimodal patterns. Randomizations of  
249 observational data were performed for complete datasets and specific oceanic regions (A),  
250 and in mock communities (B). The typical occupancy-frequency pattern of the randomized  
251 datasets was characterized by most populations being detected at 2-4 sites with a monotonical  
252 decrease in the number of populations occupying increasing number of sites. No randomized  
253 community dataset exhibited a significant bimodal pattern. The randomized mock community  
254 typically displayed prevalence of most populations occupying 2-4 sites but with no significant  
255 bimodal pattern found. Microbial biomes (C-D) were defined by shifts from bimodal  
256 occupancy-frequency patterns to unimodal patterns by testing the occupancy-frequency  
257 distributions with combinations of sites within the Tara oceans transect. Red dashed lines  
258 denote environmental and dispersal filtering of microbial assemblages resulting  
259 geographically constricted populations. Color denotes significance level of Mitchell-Old's  
260 and Shaw's test for bimodality.

261 **Supporting information**

262

263 **Supplementary figures and tables**

264

265 **Figure S1.** Schematic map of sampled stations in the Tara oceans<sup>6</sup> and Malaspina<sup>7</sup> datasets  
266 included in the analyses and superimposed with Longhurst's biogeographical division of the  
267 ocean into biomes and provinces<sup>8</sup>. Blue, Brown, Green and Yellow color denote Polar,  
268 Coastal, Westerlies and Trades biomes, respectively.

269

270 **Figure S2.** *In silico* tests of the effects of sequencing depth on the cumulative number of core  
271 compared to satellite populations for the rarefied total community obtained from Tara Oceans  
272 (A), and one mock community (B) obtained from randomizing the Tara Oceans dataset and  
273 rarefying as in (A).

274

**Table 1.** Prevalence of bimodal compared to unimodal occupancy-frequency patterns within the Tara Oceans and Malaspina transects for different oceanic basins and within Longhurst’s biomes and provinces<sup>8</sup>. Asterisks denote level of significance (\*\*\*) <0.001, \*\* <0.01, \* <0.05).

| Dataset     | Region            | Taxa               |                       |                       |                              |                              |                        |
|-------------|-------------------|--------------------|-----------------------|-----------------------|------------------------------|------------------------------|------------------------|
|             |                   | ALL OTUs (n=35651) | Euryarchaeota (n=550) | Cyanobacteria (n=963) | Alphaproteobacteria (n=7151) | Gammaproteobacteria (n=7766) | Bacteroidetes (n=3380) |
| Tara Oceans | Full transect     | BIMODAL**          | OTHER                 | OTHER                 | BIMODAL***                   | OTHER                        | OTHER                  |
|             | South Pacific     | BIMODAL***         | OTHER                 | BIMODAL*              | BIMODAL***                   | BIMODAL***                   | BIMODAL***             |
|             | North Atlantic    | BIMODAL***         | BIMODAL***            | BIMODAL***            | BIMODAL***                   | BIMODAL**                    | BIMODAL**              |
|             | Coastal Biome (L) | BIMODAL*           | OTHER                 | OTHER                 | BIMODAL***                   | BIMODAL*                     | OTHER                  |
|             | Trades Biome (L)  | BIMODAL***         | OTHER                 | BIMODAL*              | BIMODAL***                   | BIMODAL***                   | BIMODAL***             |
|             | Westerlies (L)    | BIMODAL***         | OTHER                 | BIMODAL*              | BIMODAL***                   | BIMODAL***                   | BIMODAL***             |
|             | MEDI (L)          | BIMODAL***         | UNIMODAL              | BIMODAL*              | BIMODAL***                   | BIMODAL***                   | BIMODAL***             |
|             | EAFR (L)          | BIMODAL***         | BIMODAL***            | BIMODAL***            | BIMODAL***                   | BIMODAL**                    | BIMODAL***             |
|             | SATL (L)          | BIMODAL**          | UNIMODAL              | BIMODAL***            | BIMODAL***                   | UNIMODAL                     | BIMODAL*               |
|             | SPSG (L)          | BIMODAL***         | OTHER                 | BIMODAL*              | BIMODAL***                   | BIMODAL***                   | BIMODAL***             |
| NASW (L)    | BIMODAL***        | BIMODAL***         | BIMODAL***            | BIMODAL***            | BIMODAL*                     | BIMODAL*                     |                        |

**Table 1** continued.

| Dataset                 | Region                    | Taxa               |                       |                             |                             |                        |                             |
|-------------------------|---------------------------|--------------------|-----------------------|-----------------------------|-----------------------------|------------------------|-----------------------------|
|                         |                           | ALL OTUs (n=3902)  | Thaumarchaeota (n=48) | Gammaproteobacteria (n=384) | Alphaproteobacteria (n=405) | Actinobacteria (n=143) | Deltaproteobacteria (n=433) |
| Malaspina<br>0.2/0.8 μm | Full transect             | BIMODAL*/BIMODAL   | OTHER/OTHER           | OTHER/OTHER                 | OTHER/BIMODAL***            | OTHER/OTHER            | OTHER/OTHER                 |
|                         | South Atlantic            | BIMODAL**/BIMODAL* | OTHER/BIMODAL**       | BIMODAL**/BIMODAL**         | OTHER/BIMODAL**             | UNIMODAL/UNIMODAL      | BIMODAL*/UNIMODAL           |
|                         | Indian Ocean              | ND/BIMODAL*        | ND/OTHER              | ND/BIMODAL**                | ND/BIMODAL**                | ND/BIMODAL***          | ND/UNIMODAL                 |
|                         | WMbSC 2: NADW-CDW-AABW    | BIMODAL*/UNIMODAL  | BIMODAL***/ND         | BIMODAL**/ND                | BIMODAL**/ND                | OTHER/UNIMODAL         | BIMODAL*/UNIMODAL           |
|                         | WMbSC 4: Purest AABW Ross | ND/BIMODAL*        | ND/BIMODAL***         | ND/BIMODAL***               | ND/BIMODAL***               | ND/BIMODAL*            | UNIMODAL/BIMODAL*           |
| SATL (L)                | UNIMODAL/BIMODAL*         | OTHER/OTHER        | BIMODAL***/BIMODAL*   | OTHER/BIMODAL***            | OTHER/BIMODAL*              | UNIMODAL/UNIMODAL      |                             |

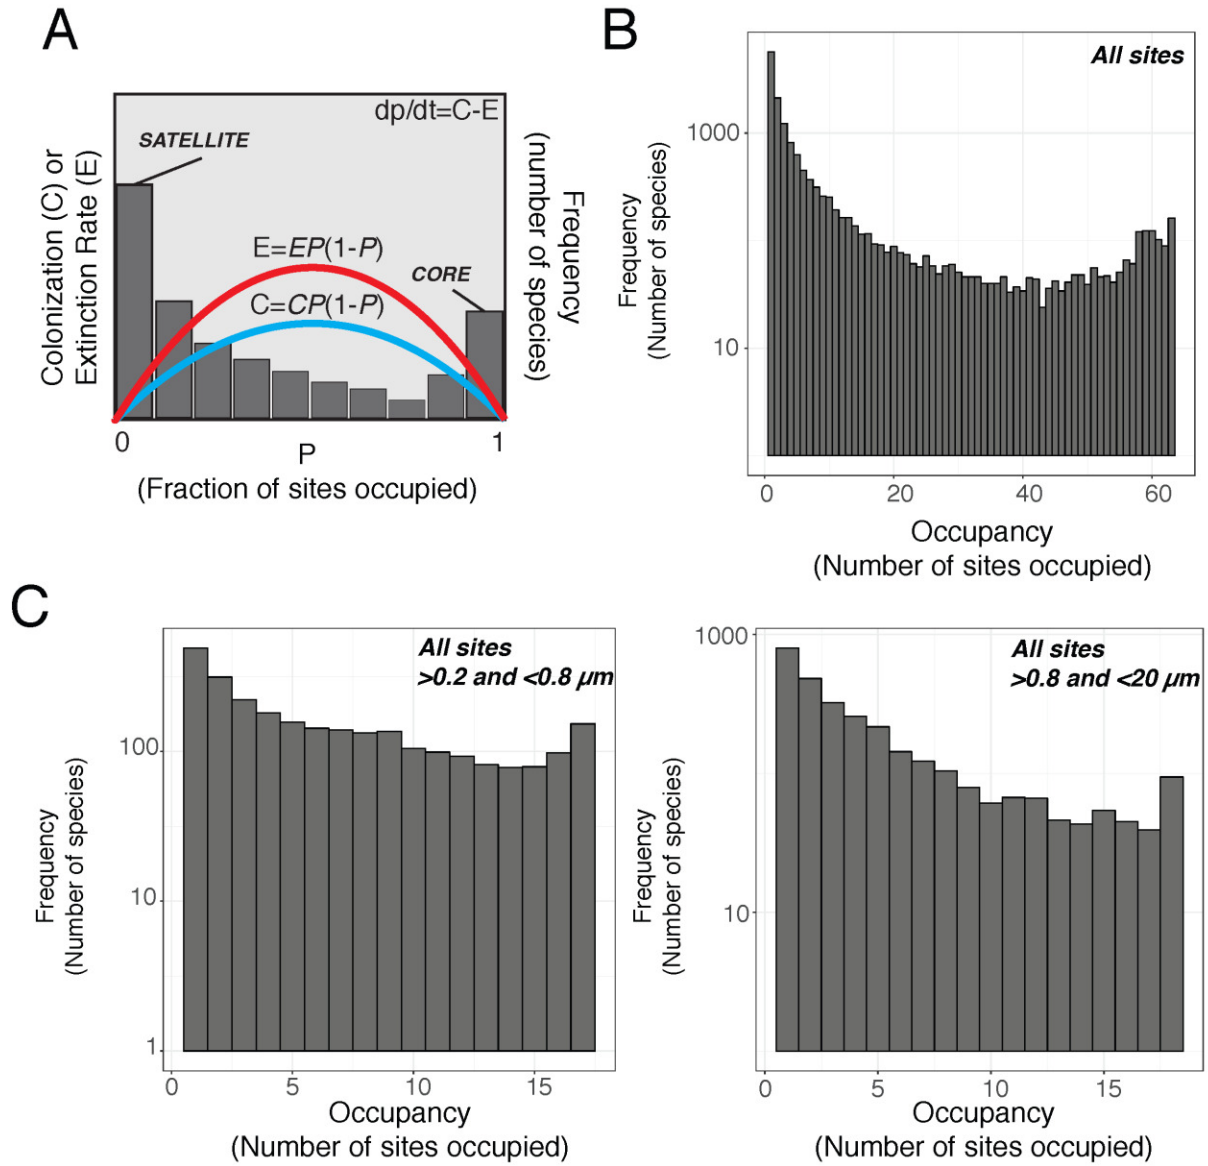

*Figure 1*

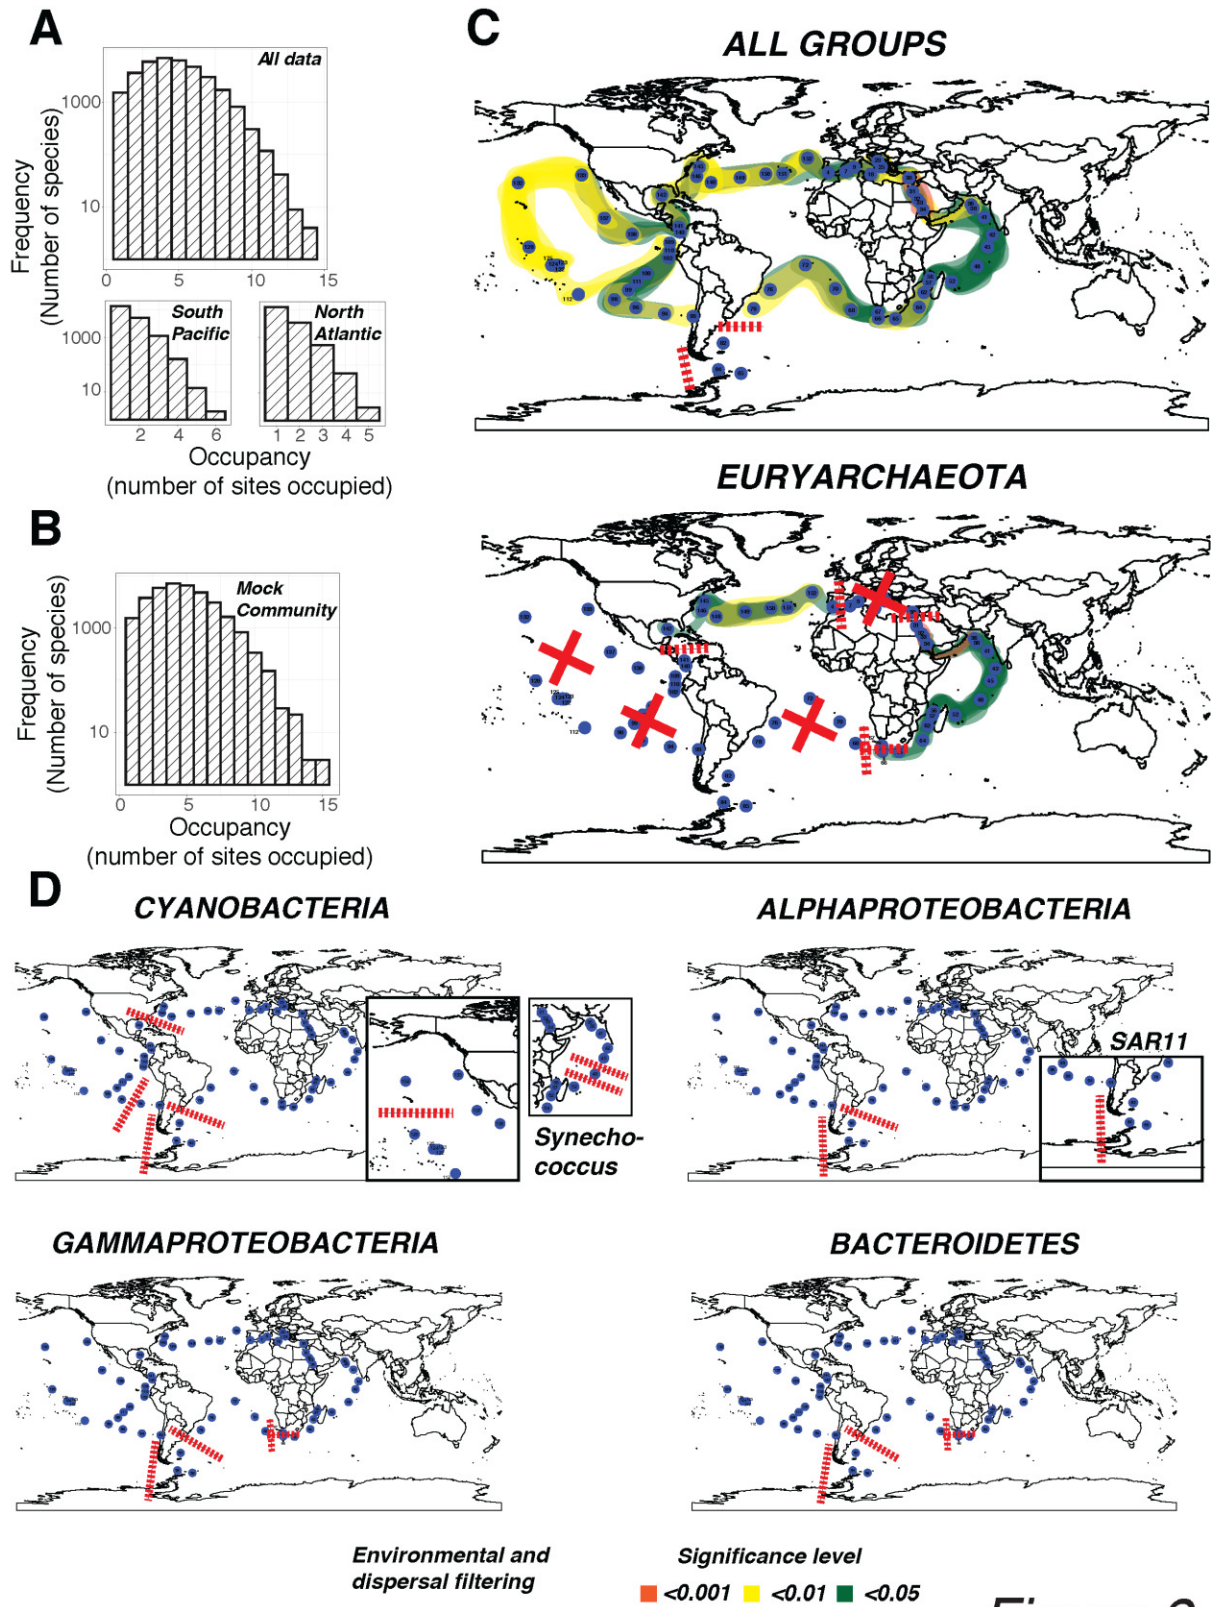

Figure 2



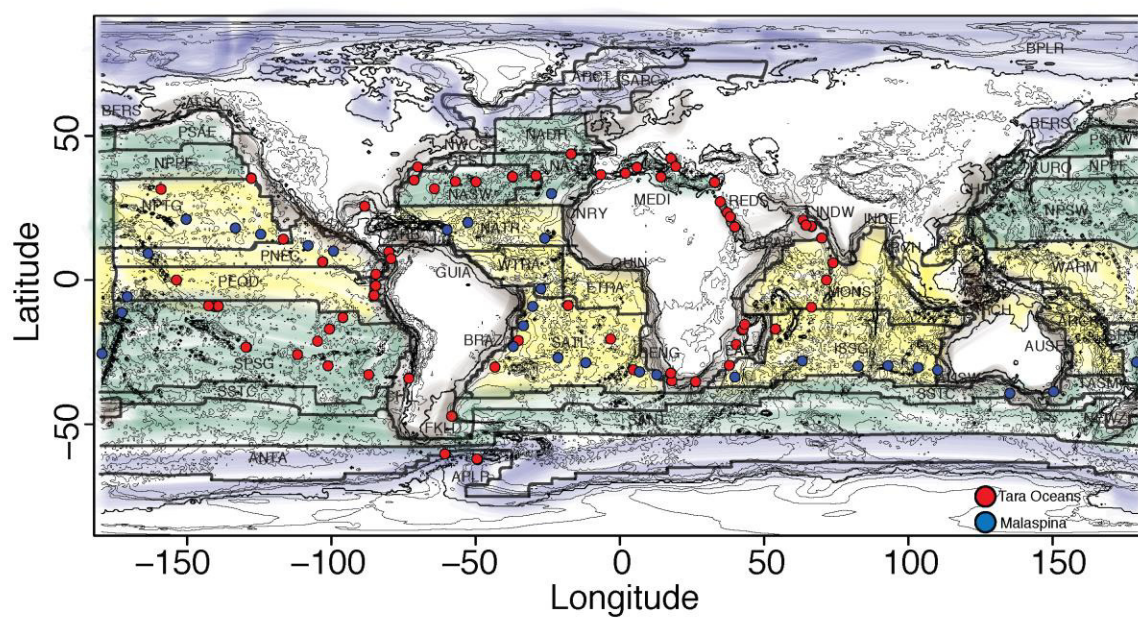

*Supplementary Figure 1*



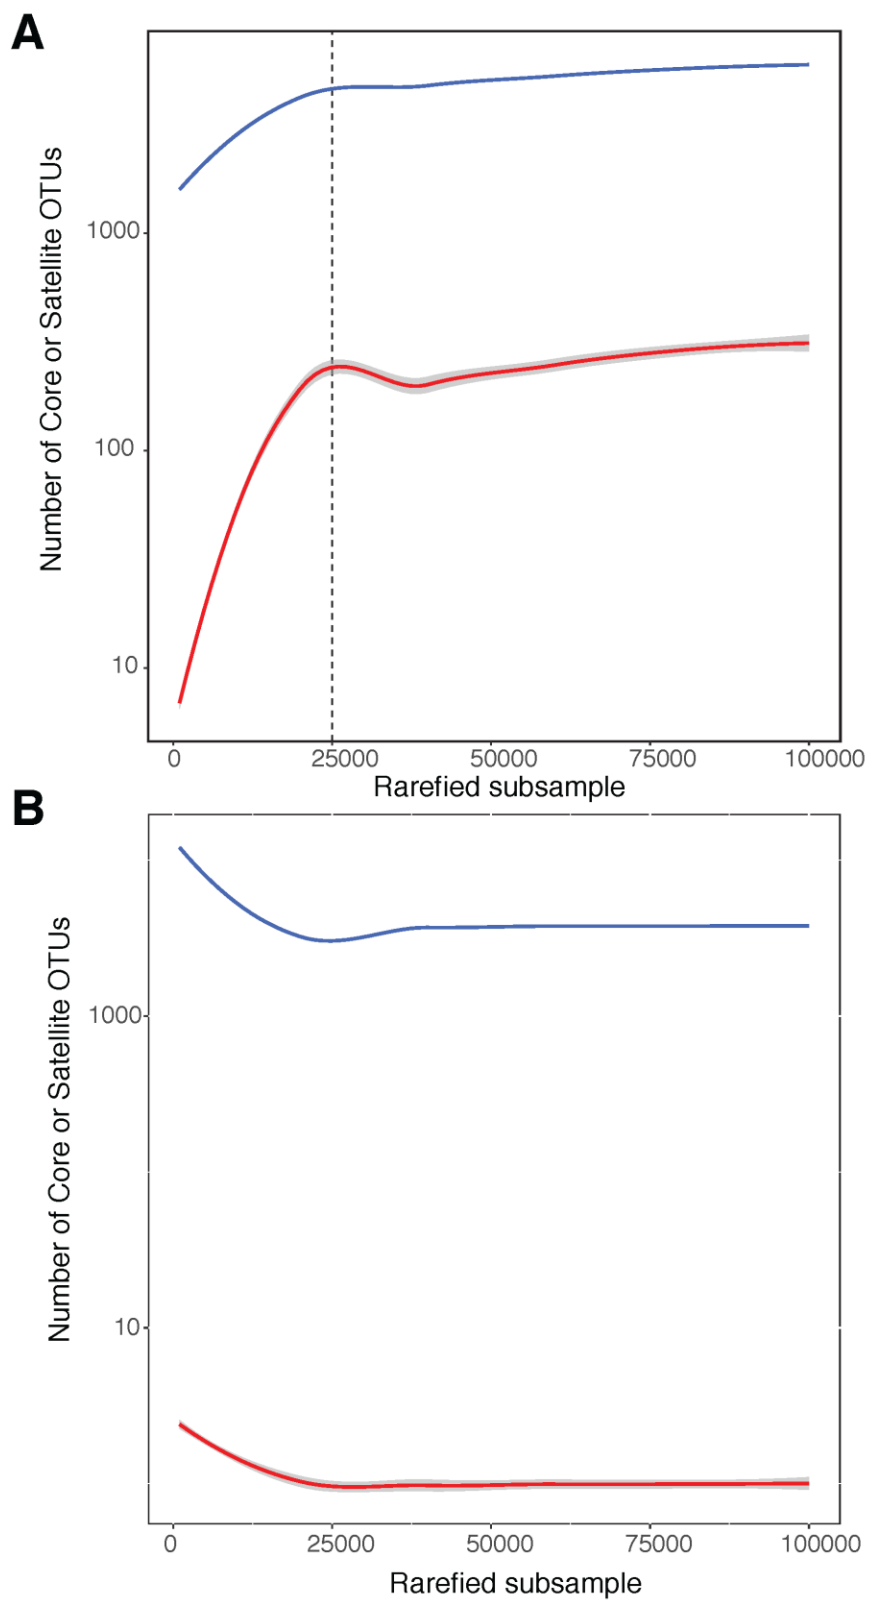

*Supplementary Figure 2*
